# Supplementary material for: Connectedness to Nature Does Not Explain the Variation in Physical Activity and Body Composition in Adults and Older People
Source: MDPI journal article supplement (doi:10.3390/ijerph182211951), 2021-11-14
Supplement: s1 [file s1]

Supplementary Data

Table S1 - Operationalisation of demographic variables

| Measure                        |                     | Item                                                           | Responses                                                                                                                                                                                                                                            |
|--------------------------------|---------------------|----------------------------------------------------------------|------------------------------------------------------------------------------------------------------------------------------------------------------------------------------------------------------------------------------------------------------|
| Demographic variables          | Age                 | What was your age last birthday?                               |                                                                                                                                                                                                                                                      |
|                                | Gender              | Sex of respondent?                                             | Male (0); Female (1)                                                                                                                                                                                                                                 |
|                                | Marital status      | Marital status of respondent                                   | Married/cohabiting (1); Single (2); Separated/divorced/widowed (3)                                                                                                                                                                                   |
|                                | Number of children  | How many children do you have?                                 | 0; 1; 2; ≥ 3                                                                                                                                                                                                                                         |
|                                | Education           | What are your academic qualifications?                         | No Education (0); Elementary school (1); Middle school (2); High school (3); University (4); Post-graduation/master's/doctorate (5)                                                                                                                  |
|                                | Occupational status | What is your occupational situation?                           | Employee (1); Unemployed (2); Retired (3); Student (4); Other (5)                                                                                                                                                                                    |
|                                | Residence place     | What is your place of residence?                               | Rural (1); Semi-urban (2); Urban (3)                                                                                                                                                                                                                 |
|                                | Car ownership       | Do you own or have access to a car?                            | No (0); Yes (1)                                                                                                                                                                                                                                      |
|                                | Dog ownership       | Do you have dogs that you usually walk?                        | No (0); Yes (1)                                                                                                                                                                                                                                      |
| Contexts for physical activity |                     | What is your favorite/privileged places for physical activity? | In parks, outdoors, etc. (1); At home (2); On the way between home and school, work or shop (3); At a health or fitness centre (4); At a sports centre (5); At work (6); At school or university (7); Elsewhere (spontaneous) (8); or Don't know (9) |

**Table S2.** Association of demographic data with age, physical activity and body composition.

| Variables                                                           | Age                    | Marital status          | Number of children | Education            | Occupational status     | Residence place | Car ownership           | Dog ownership           |
|---------------------------------------------------------------------|------------------------|-------------------------|--------------------|----------------------|-------------------------|-----------------|-------------------------|-------------------------|
| <b>MEN (n=77)</b>                                                   |                        |                         |                    |                      |                         |                 |                         |                         |
| Age (years)                                                         |                        | <b>0.866**</b> $\eta^2$ | <b>0.770**</b> $r$ | 0.095 $r_s$          | <b>0.729**</b> $\eta^2$ | 0.060 $\eta^2$  | <b>0.317**</b> $r_{pb}$ | -0.015 $r_{pb}$         |
| Total PA (TPA, min/week)                                            | -0.032 $r$             | 0.059 $\eta^2$          | 0.113 $r$          | 0.065 $r_s$          | 0.318 $\eta^2$          | 0.162 $\eta^2$  | 0.073 $r_{pb}$          | <b>0.275*</b> $r_{pb}$  |
| Moderate-vigorous PA (MVPA, min/week)                               | 0.044 $r$              | 0.103 $\eta^2$          | -0.015 $r$         | 0.068 $r_s$          | 0.128 $\eta^2$          | 0.079 $\eta^2$  | -0.022 $r_{pb}$         | 0.197 $r_{pb}$          |
| Steps/day (n°)                                                      | <b>0.250**</b> $r$     | 0.242 $\eta^2$          | <b>0.268**</b> $r$ | 0.049 $r_s$          | <b>0.380*</b> $\eta^2$  | 0.189 $\eta^2$  | 0.116 $r_{pb}$          | <b>0.255*</b> $r_{pb}$  |
| Contexts for PA (1-8)                                               | <b>0.405*</b> $\eta^2$ | 0.264 $V$               | 0.270 $\eta^2$     | <b>0.321*</b> $V$    | 0.235 $V$               | 0.262 $V$       | 0.378 $V$               | 0.249 $V$               |
| Fat mass (FM, %)                                                    | <b>0.499**</b> $r$     | <b>0.353**</b> $\eta^2$ | <b>0.364**</b> $r$ | -0.044 $r_s$         | <b>0.485**</b> $\eta^2$ | 0.251 $\eta^2$  | <b>0.291*</b> $r_{pb}$  | -0.101 $r_{pb}$         |
| Visceral fat area (VFA, cm <sup>2</sup> )                           | <b>0.670**</b> $r$     | <b>0.553**</b> $\eta^2$ | <b>0.554**</b> $r$ | 0.025 $r_s$          | <b>0.580**</b> $\eta^2$ | 0.201 $\eta^2$  | <b>0.310**</b> $r_{pb}$ | -0.083 $r_{pb}$         |
| Fat-free mass (FFM, kg)                                             | <b>-0.295**</b> $r$    | 0.165 $\eta^2$          | -0.075 $r$         | -0.005 $r_s$         | 0.209 $\eta^2$          | 0.003 $\eta^2$  | -0.018 $r_{pb}$         | -0.086 $r_{pb}$         |
| Skeletal muscle mass (SMM, kg)                                      | -0.321 $r$             | 0.183 $\eta^2$          | -0.100 $r$         | -0.013 $r_s$         | 0.226 $\eta^2$          | 0.016 $\eta^2$  | -0.024 $r_{pb}$         | -0.094 $r_{pb}$         |
| Appendicular skeletal muscle mass (ASMM, kg)                        | <b>-0.347**</b> $r$    | 0.227 $\eta^2$          | -0.095 $r$         | -0.021 $r_s$         | 0.235 $\eta^2$          | 0.038 $\eta^2$  | -0.103 $r_{pb}$         | -0.086 $r_{pb}$         |
| Appendicular skeletal muscle mass index (ASMMI, kg/m <sup>2</sup> ) | -0.194 $r$             | 0.081 $\eta^2$          | 0.011 $r$          | -0.080 $r_s$         | 0.174 $\eta^2$          | 0.039 $\eta^2$  | 0.087 $r_{pb}$          | -0.065 $r_{pb}$         |
| Trunk skeletal muscle mass index (TSMMI, kg/m <sup>2</sup> )        | 0.025 $r$              | 0.157 $\eta^2$          | 0.084 $r$          | -0.093 $r_s$         | 0.278 $\eta^2$          | 0.064 $\eta^2$  | 0.201 $r_{pb}$          | 0.014 $r_{pb}$          |
| <b>WOMEN (n=142)</b>                                                |                        |                         |                    |                      |                         |                 |                         |                         |
| Age (years)                                                         |                        | <b>0.767**</b> $\eta^2$ | 0.698 $r$          | <b>0.186*</b> $r_s$  | <b>0.784**</b> $\eta^2$ | 0.079 $\eta^2$  | <b>0.255**</b> $r_{pb}$ | <b>-0.169*</b> $r_{pb}$ |
| Total PA (TPA, min/week)                                            | 0.108 $r$              | <b>0.212**</b> $\eta^2$ | <b>0.230**</b> $r$ | -0.079 $r_s$         | <b>0.230*</b> $\eta^2$  | 0.186 $\eta^2$  | 0.040 $r_{pb}$          | 0.104 $r_{pb}$          |
| Moderate-vigorous PA (MVPA, min/week)                               | <b>-0.177**</b> $r$    | 0.185 $\eta^2$          | -0.012 $r$         | -0.077 $r_s$         | 0.155 $\eta^2$          | 0.193 $\eta^2$  | -0.067 $r_{pb}$         | 0.125 $r_{pb}$          |
| Steps/day (n°)                                                      | <b>0.337**</b> $r$     | <b>0.291**</b> $\eta^2$ | <b>0.322**</b> $r$ | -0.071 $r_s$         | <b>0.362**</b> $\eta^2$ | 0.143 $\eta^2$  | 0.062 $r_{pb}$          | 0.021 $r_{pb}$          |
| Contexts for PA (1-8)                                               | <b>0.992</b> $\eta^2$  | <b>0.272*</b> $V$       | 0.245 $\eta^2$     | <b>0.235</b> $V$     | 0.242 $V$               | 0.191 $V$       | 0.274 $V$               | 0.221 $V$               |
| Fat mass (FM, %)                                                    | <b>0.413**</b> $r$     | <b>0.318**</b> $\eta^2$ | <b>0.243**</b> $r$ | -0.055 $r_s$         | 0.246 $\eta^2$          | 0.030 $\eta^2$  | 0.102 $r_{pb}$          | -0.034 $r_{pb}$         |
| Visceral fat area (VFA, cm <sup>2</sup> )                           | <b>0.790**</b> $r$     | <b>0.573**</b> $\eta^2$ | <b>0.541**</b> $r$ | 0.098 $r_s$          | <b>0.596**</b> $\eta^2$ | 0.054 $\eta^2$  | <b>0.190*</b> $r_{pb}$  | -0.077 $r_{pb}$         |
| Fat-free mass (FFM, kg)                                             | <b>-0.204*</b> $r$     | 0.130 $\eta^2$          | -0.109 $r$         | <b>0.225**</b> $r_s$ | 0.101 $\eta^2$          | 0.056 $\eta^2$  | -0.062 $r_{pb}$         | 0.049 $r_{pb}$          |
| Skeletal muscle mass (SMM, kg)                                      | <b>-0.218**</b> $r$    | 0.147 $\eta^2$          | -0.115 $r$         | <b>0.214*</b> $r_s$  | 0.119 $\eta^2$          | 0.052 $\eta^2$  | -0.071 $r_{pb}$         | 0.054 $r_{pb}$          |
| Appendicular skeletal muscle mass (ASMM, kg)                        | <b>-0.238**</b> $r$    | 0.161 $\eta^2$          | -0.142 $r$         | <b>0.228**</b> $r_s$ | 0.114 $\eta^2$          | 0.070 $\eta^2$  | -0.056 $r_{pb}$         | 0.055 $r_{pb}$          |
| Appendicular skeletal muscle mass index (ASMMI, kg/m <sup>2</sup> ) | 0.006 $r$              | 0.020 $\eta^2$          | 0.014 $r$          | <b>0.185*</b> $r_s$  | 0.142 $\eta^2$          | 0.026 $\eta^2$  | -0.002 $r_{pb}$         | 0.000 $r_{pb}$          |
| Trunk skeletal muscle mass index (TSMMI, kg/m <sup>2</sup> )        | <b>0.236**</b> $r$     | 0.148 $\eta^2$          | 0.164 $r$          | 0.061 $r_s$          | <b>0.288*</b> $\eta^2$  | 0.048 $\eta^2$  | 0.052 $r_{pb}$          | -0.013 $r_{pb}$         |

Abbreviations: PA = Physical activity,  $\eta^2$  = Eta square,  $r_s$  = Spearman's correlation coefficient,  $r_{pb}$  = point-biserial correlation coefficient,  $r$  = Pearson correlation coefficient,  $V$  = Cramér's V coefficient, \*  $p \leq 0.05$ , \*\*  $p \leq 0.01$

**Table S3** - Correlations developed for the body composition variables in both genders

|                             | FM<br>(kg)     | FM<br>(%)       | VFA<br>(cm <sup>2</sup> ) | FFM<br>(kg)    | SMM<br>(kg)    | ASMM<br>(kg)   | ASMMI<br>(kg/m <sup>2</sup> ) | TSMMI<br>(kg/m <sup>2</sup> ) |
|-----------------------------|----------------|-----------------|---------------------------|----------------|----------------|----------------|-------------------------------|-------------------------------|
| FM (kg)                     |                | <b>0.946**</b>  | <b>0.898**</b>            | 0.085          | 0.067          | 0.032          | 0.204                         | <b>0.282*</b>                 |
| FM (%)                      | <b>0.904**</b> |                 | <b>0.919**</b>            | -0.209         | <b>-0.227*</b> | <b>-0.260*</b> | -0.069                        | 0.091                         |
| VFA (cm <sup>2</sup> )      | <b>0.795**</b> | <b>0.809**</b>  |                           | -0.048         | -0.070         | -0.088         | 0.064                         | 0.206                         |
| FFM (kg)                    | 0.042          | <b>-0.302**</b> | -0.096                    |                | <b>0.998**</b> | <b>0.962**</b> | <b>0.682**</b>                | <b>0.920**</b>                |
| SMM (kg)                    | 0.026          | <b>-0.319**</b> | -0.109                    | <b>0.998**</b> |                | <b>0.961**</b> | <b>0.691**</b>                | <b>0.920**</b>                |
| ASMM (kg)                   | 0.068          | <b>-0.272**</b> | -0.124                    | <b>0.975**</b> | <b>0.968**</b> |                | 0.855                         | <b>0.504**</b>                |
| ASMMI, (kg/m <sup>2</sup> ) | <b>0.222**</b> | -0.099          | 0.105                     | <b>0.872**</b> | <b>0.879**</b> | <b>0.859**</b> |                               | <b>0.812**</b>                |
| TSMMI (kg/m <sup>2</sup> )  | <b>0.381**</b> | 0.137           | <b>0.407**</b>            | <b>0.615**</b> | <b>0.631**</b> | <b>0.534**</b> | <b>0.851**</b>                |                               |

Notes: above the diagonal line the values refer to men; below the diagonal line the values refer to women; Abbreviations: Fat Mass (FM, kg), Fat Mass (FM, %), Visceral Fat area (VFA), Fat-Free Mass (FFM), Skeletal Muscle Mass (SMM), Appendicular Skeletal Muscle Mass (ASMM), Appendicular Skeletal Muscle Mass Index (ASMMI), Trunk Skeletal Muscle Mass Index (TSMMI), \*  $p \leq 0.05$ , \*\*  $p \leq 0.01$
