# Supplementary figures and images for: Connectedness to Nature Does Not Explain the Variation in Physical Activity and Body Composition in Adults and Older People
Source: MDPI journal article supplement (doi:10.3390/ijerph182211951), 2021-11-14

Supplement Figure S1. Land cover classification of the study area

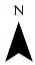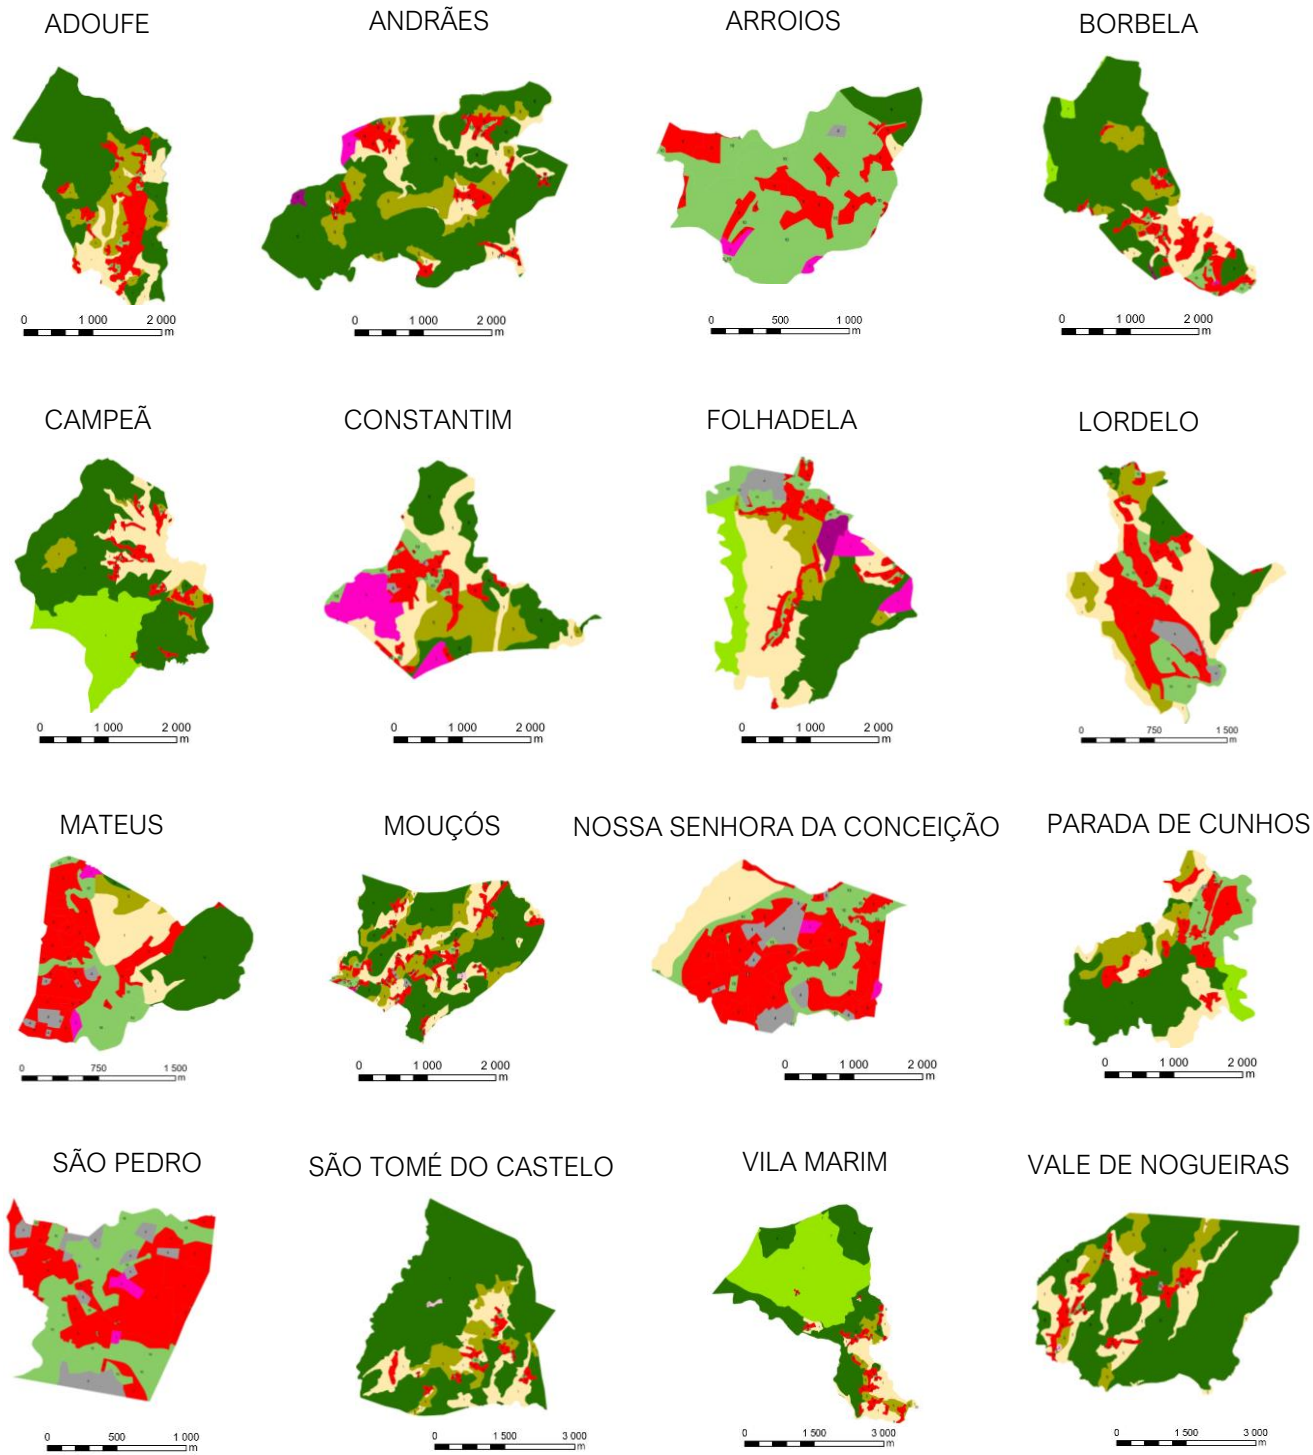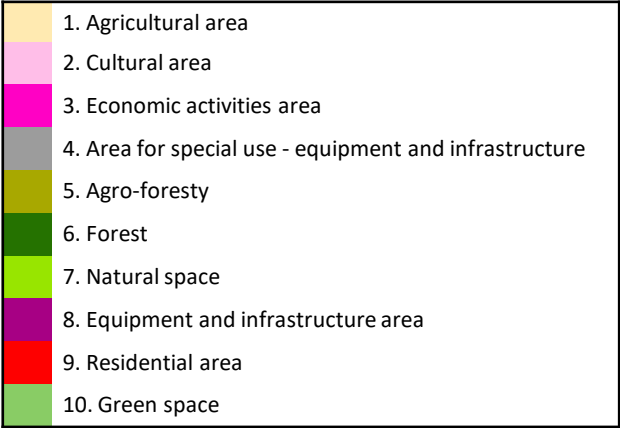

Supplement: s1 [file s1]
